# Supplementary material for: Impact of clinical domains other than arthritis on composite outcomes in psoriatic arthritis: comparison of treatment effects in the SEAM-PsA trial
Source: HighWire-hosted journal article supplement (doi:10.1136/rmdopen-2022-002366), 2022-07-01
Supplement: rmdopen-2022-002366supp001_data_supplement.pdf [file rmdopen-2022-002366supp001_data_supplement.pdf]

## Supplemental Material

### Impact of clinical domains other than arthritis on composite outcomes in psoriatic arthritis: comparison of treatment effects in the SEAM-PsA trial

#### Running title

Clinical domains and outcomes in psoriatic arthritis

#### Authors and Institutions

Philip S. Helliwell, MD, PhD;<sup>1</sup> Phillip J. Mease, MD;<sup>2</sup> Arthur Kavanaugh, MD;<sup>3</sup> Laura C. Coates, MD;<sup>4</sup> Alexis Ogdie, MD;<sup>5</sup> Atul Deodhar, MD;<sup>6</sup> Vibeke Strand, MD;<sup>7</sup> Greg Kricorian, MD;<sup>8</sup> Lyrica Liu, PhD;<sup>9</sup> David Collier, MD;<sup>8</sup> Dafna D. Gladman, MD<sup>10</sup>

<sup>1</sup>Leeds Institute of Rheumatic and Musculoskeletal Medicine, University of Leeds, Leeds, UK; <sup>2</sup>Rheumatology Research, Swedish Medical Center/Providence St. Joseph Health and University of Washington, Seattle, WA, USA; <sup>3</sup>Division of Rheumatology Allergy, and Immunology, University of California San Diego, La Jolla, CA, USA; <sup>4</sup>Department of Orthopaedics, Rheumatology, and Musculoskeletal Sciences, University of Oxford, Oxford, UK; <sup>5</sup>Department of Medicine, University of Pennsylvania, Philadelphia, PA, USA; <sup>6</sup>Division of Arthritis & Rheumatic Diseases, Oregon Health & Science University, Portland, OR, USA; <sup>7</sup>Division of Immunology/Rheumatology, Stanford University, Palo Alto, CA, USA; <sup>8</sup>Clinical Development, Amgen Inc., Thousand Oaks, CA, USA; <sup>9</sup>Global Biostatistics, Amgen Inc., Thousand Oaks, CA, USA; <sup>10</sup>Centre for Prognosis Studies in The Rheumatic Diseases, University of Toronto, Toronto, ON, Canada

#### Corresponding author

Philip S. Helliwell, MD, PhD; Leeds Institute of Rheumatic and Musculoskeletal Medicine, University of Leeds, 2nd Floor, Chapel Allerton Hospital, Harehills Lane, Leeds LS7 4SA, UK. Email: P.Helliwell@leeds.ac.uk; Phone: +44 113 392 3064

**Target journal:** *RMD Open*

**Supplementary material:** 2 tables

**Supplemental Table 1.** Analysis of MDA, PASDAS LDA, and PASDAS Good Responses by baseline enthesitis (SPARCC EI and LEI), baseline LDI, baseline mNAPSI, and baseline psoriasis-affected BSA at Week 24

| Clinical Domain                                                  | Odds Ratio (95% CI) | P-value <sup>a</sup> |
|------------------------------------------------------------------|---------------------|----------------------|
| <b>MDA using SPARCC EI</b>                                       |                     |                      |
| Baseline enthesitis using SPARCC EI                              |                     |                      |
| Baseline enthesitis (SPARCC EI > 0 vs = 0)                       | 0.5 (0.4, 0.7)      | < 0.0001             |
| Baseline BMI (> 30 kg/m <sup>2</sup> vs ≤ 30 kg/m <sup>2</sup> ) | 0.5 (0.4, 0.7)      | < 0.0001             |
| Prior use of nonbiologic DMARD (yes vs no)                       | 0.7 (0.4, 1.1)      | 0.1000               |
| Baseline 66-swollen joint count                                  | 1.0 (0.9, 1.0)      | < 0.0001             |
| Baseline enthesitis using LEI                                    |                     |                      |
| Baseline enthesitis (LEI > 0 vs = 0)                             | 0.5 (0.4, 0.7)      | < 0.0001             |
| Baseline BMI (> 30 kg/m <sup>2</sup> vs ≤ 30 kg/m <sup>2</sup> ) | 0.6 (0.4, 0.8)      | 0.0002               |
| Prior use of nonbiologic DMARD (yes vs no)                       | 0.7 (0.4, 1.1)      | 0.1113               |
| Baseline 66-swollen joint count                                  | 1.0 (0.9, 1.0)      | 0.0001               |
| Baseline LDI                                                     |                     |                      |
| Baseline LDI (> 0 vs = 0)                                        | 1.4 (1.0, 2.0)      | 0.0457               |
| Baseline BMI (> 30 kg/m <sup>2</sup> vs ≤ 30 kg/m <sup>2</sup> ) | 0.5 (0.4, 0.7)      | < 0.0001             |
| Prior use of nonbiologic DMARD (yes vs no)                       | 0.7 (0.4, 1.1)      | 0.1301               |
| Baseline 66-swollen joint count                                  | 0.9 (0.9, 1.0)      | < 0.0001             |
| Baseline mNAPSI                                                  |                     |                      |
| Baseline mNAPSI (> 1 vs ≤ 1)                                     | 1.8 (1.1, 2.9)      | 0.0233               |
| Baseline BMI (> 30 kg/m <sup>2</sup> vs ≤ 30 kg/m <sup>2</sup> ) | 0.5 (0.3, 0.7)      | 0.0002               |
| Prior use of nonbiologic DMARD (yes vs no)                       | 0.6 (0.4, 1.1)      | 0.1241               |
| Baseline 66-swollen joint count                                  | 0.9 (0.9, 1.0)      | < 0.0001             |
| Baseline psoriasis-affected BSA                                  |                     |                      |
| Baseline BSA (≥ 10% vs < 10%)                                    | 0.9 (0.7, 1.3)      | 0.6733               |
| Baseline BMI (> 30 kg/m <sup>2</sup> vs ≤ 30 kg/m <sup>2</sup> ) | 0.5 (0.4, 0.7)      | < 0.0001             |
| Prior use of nonbiologic DMARD (yes vs no)                       | 0.7 (0.4, 1.1)      | 0.1614               |
| Baseline 66-swollen joint count                                  | 1.0 (0.9, 1.0)      | < 0.0001             |
| <b>MDA using LEI</b>                                             |                     |                      |
| Baseline enthesitis using SPARCC EI                              |                     |                      |
| Baseline enthesitis (SPARCC EI > 0 vs = 0)                       | 0.6 (0.4, 0.8)      | 0.0004               |
| Baseline BMI (> 30 kg/m <sup>2</sup> vs ≤ 30 kg/m <sup>2</sup> ) | 0.5 (0.4, 0.7)      | < 0.0001             |
| Prior use of nonbiologic DMARD (yes vs no)                       | 0.7 (0.5, 1.1)      | 0.1648               |
| Baseline 66-swollen joint count                                  | 1.0 (0.9, 1.0)      | 0.0003               |
| Baseline enthesitis using LEI                                    |                     |                      |
| Baseline enthesitis (LEI > 0 vs = 0)                             | 0.5 (0.4, 0.7)      | < 0.0001             |
| Baseline BMI (> 30 kg/m <sup>2</sup> vs ≤ 30 kg/m <sup>2</sup> ) | 0.5 (0.4, 0.7)      | < 0.0001             |
| Prior use of nonbiologic DMARD (yes vs no)                       | 0.7 (0.5, 1.2)      | 0.1771               |
| Baseline 66-swollen joint count                                  | 1.0 (0.9, 1.0)      | 0.0007               |
| Baseline LDI                                                     |                     |                      |
| Baseline LDI (> 0 vs = 0)                                        | 1.4 (1.0, 2.0)      | 0.0270               |
| Baseline BMI (> 30 kg/m <sup>2</sup> vs ≤ 30 kg/m <sup>2</sup> ) | 0.5 (0.4, 0.7)      | < 0.0001             |
| Prior use of nonbiologic DMARD (yes vs no)                       | 0.7 (0.5, 1.2)      | 0.1998               |
| Baseline 66-swollen joint count                                  | 1.0 (0.9, 1.0)      | < 0.0001             |
| Baseline mNAPSI                                                  |                     |                      |
| Baseline mNAPSI (> 1 vs ≤ 1)                                     | 1.7 (1.1, 2.8)      | 0.0278               |
| Baseline BMI (> 30 kg/m <sup>2</sup> vs ≤ 30 kg/m <sup>2</sup> ) | 0.5 (0.3, 0.7)      | < 0.0001             |
| Prior use of nonbiologic DMARD (yes vs no)                       | 0.7 (0.4, 1.3)      | 0.2507               |

| <b>Clinical Domain</b>                                             | <b>Odds Ratio (95% CI)</b> | <b>P-value<sup>a</sup></b> |
|--------------------------------------------------------------------|----------------------------|----------------------------|
| Baseline 66-swollen joint count                                    | 1.0 (0.9, 1.0)             | < 0.0001                   |
| <b>Baseline psoriasis-affected BSA</b>                             |                            |                            |
| Baseline BSA ( $\geq 10\%$ vs $< 10\%$ )                           | 0.9 (0.6, 1.2)             | 0.3991                     |
| Baseline BMI ( $> 30 \text{ kg/m}^2$ vs $\leq 30 \text{ kg/m}^2$ ) | 0.5 (0.4, 0.7)             | < 0.0001                   |
| Prior use of nonbiologic DMARD (yes vs no)                         | 0.8 (0.5, 1.2)             | 0.2566                     |
| Baseline 66-swollen joint count                                    | 1.0 (0.9, 1.0)             | < 0.0001                   |
| <b>PASDAS LDA<sup>a</sup></b>                                      |                            |                            |
| <b>Baseline enthesitis using SPARCC EI</b>                         |                            |                            |
| Baseline enthesitis (SPARCC EI $> 0$ vs = 0)                       | 0.6 (0.4, 0.8)             | 0.0015                     |
| Baseline BMI ( $> 30 \text{ kg/m}^2$ vs $\leq 30 \text{ kg/m}^2$ ) | 0.5 (0.4, 0.7)             | 0.0001                     |
| Prior use of nonbiologic DMARD (yes vs no)                         | 0.7 (0.4, 1.0)             | 0.0627                     |
| Baseline 66-swollen joint count                                    | 1.0 (1.0, 1.0)             | 0.0402                     |
| Baseline PASDAS score                                              | 0.8 (0.6, 0.9)             | 0.0008                     |
| <b>Baseline enthesitis using LEI</b>                               |                            |                            |
| Baseline enthesitis (LEI $> 0$ vs = 0)                             | 0.6 (0.4, 0.8)             | 0.0008                     |
| Baseline BMI ( $> 30 \text{ kg/m}^2$ vs $\leq 30 \text{ kg/m}^2$ ) | 0.6 (0.4, 0.8)             | 0.0002                     |
| Prior use of nonbiologic DMARD (yes vs no)                         | 0.7 (0.4, 1.0)             | 0.0749                     |
| Baseline 66-swollen joint count                                    | 1.0 (1.0, 1.0)             | 0.0503                     |
| Baseline PASDAS score                                              | 0.8 (0.6, 0.9)             | 0.0010                     |
| <b>Baseline LDI</b>                                                |                            |                            |
| Baseline LDI ( $> 0$ vs = 0)                                       | 1.8 (1.3, 2.6)             | 0.0014                     |
| Baseline BMI ( $> 30 \text{ kg/m}^2$ vs $\leq 30 \text{ kg/m}^2$ ) | 0.6 (0.4, 0.8)             | 0.0002                     |
| Prior use of nonbiologic DMARD (yes vs no)                         | 0.7 (0.4, 1.0)             | 0.0758                     |
| Baseline 66-swollen joint count                                    | 1.0 (1.0, 1.0)             | 0.0458                     |
| Baseline PASDAS score                                              | 0.6 (0.5, 0.7)             | < 0.0001                   |
| <b>Baseline mNAPSI</b>                                             |                            |                            |
| Baseline mNAPSI ( $> 1$ vs $\leq 1$ )                              | 1.8 (1.1, 2.9)             | 0.0168                     |
| Baseline BMI ( $> 30 \text{ kg/m}^2$ vs $\leq 30 \text{ kg/m}^2$ ) | 0.5 (0.4, 0.8)             | 0.0010                     |
| Prior use of nonbiologic DMARD (yes vs no)                         | 0.8 (0.5, 1.4)             | 0.4655                     |
| Baseline 66-swollen joint count                                    | 1.0 (1.0, 1.0)             | 0.0388                     |
| Baseline PASDAS score                                              | 0.7 (0.6, 0.8)             | < 0.0001                   |
| <b>Baseline psoriasis-affected BSA</b>                             |                            |                            |
| Baseline BSA ( $\geq 10\%$ vs $< 10\%$ )                           | 1.2 (0.9, 1.6)             | 0.3157                     |
| Baseline BMI ( $> 30 \text{ kg/m}^2$ vs $\leq 30 \text{ kg/m}^2$ ) | 0.6 (0.4, 0.7)             | 0.0001                     |
| Prior use of nonbiologic DMARD (yes vs no)                         | 0.7 (0.4, 1.1)             | 0.0823                     |
| Baseline 66-swollen joint count                                    | 1.0 (1.0, 1.0)             | 0.0637                     |
| Baseline PASDAS score                                              | 0.7 (0.6, 0.8)             | < 0.0001                   |
| <b>PASDAS Good Responses<sup>b</sup></b>                           |                            |                            |
| <b>Baseline enthesitis using SPARCC EI</b>                         |                            |                            |
| Baseline enthesitis (SPARCC EI $> 0$ vs = 0)                       | 0.6 (0.4, 0.8)             | 0.0013                     |
| Baseline BMI ( $> 30 \text{ kg/m}^2$ vs $\leq 30 \text{ kg/m}^2$ ) | 0.5 (0.4, 0.7)             | < 0.0001                   |
| Prior use of nonbiologic DMARD (yes vs no)                         | 0.7 (0.5, 1.1)             | 0.1312                     |
| Baseline 66-swollen joint count                                    | 1.0 (1.0, 1.0)             | 0.0128                     |
| Baseline PASDAS score                                              | 0.9 (0.8, 1.1)             | 0.2405                     |
| <b>Baseline enthesitis using LEI</b>                               |                            |                            |
| Baseline enthesitis (LEI $> 0$ vs = 0)                             | 0.5 (0.4, 0.7)             | 0.0001                     |
| Baseline BMI ( $> 30 \text{ kg/m}^2$ vs $\leq 30 \text{ kg/m}^2$ ) | 0.5 (0.4, 0.7)             | < 0.0001                   |
| Prior use of nonbiologic DMARD (yes vs no)                         | 0.7 (0.5, 1.1)             | 0.1508                     |
| Baseline 66-swollen joint count                                    | 1.0 (1.0, 1.0)             | 0.0165                     |
| Baseline PASDAS score                                              | 0.9 (0.8, 1.1)             | 0.3398                     |

| Clinical Domain                                                  | Odds Ratio (95% CI) | P-value <sup>a</sup> |
|------------------------------------------------------------------|---------------------|----------------------|
| Baseline LDI                                                     |                     |                      |
| Baseline LDI (> 0 vs = 0)                                        | 1.6 (1.1, 2.3)      | 0.0101               |
| Baseline BMI (> 30 kg/m <sup>2</sup> vs ≤ 30 kg/m <sup>2</sup> ) | 0.5 (0.4, 0.7)      | < 0.0001             |
| Prior use of nonbiologic DMARD (yes vs no)                       | 0.7 (0.5, 1.1)      | 0.1602               |
| Baseline 66-swollen joint count                                  | 1.0 (1.0, 1.0)      | 0.0153               |
| Baseline PASDAS score                                            | 0.8 (0.6, 0.9)      | 0.0014               |
| Baseline mNAPSI                                                  |                     |                      |
| Baseline mNAPSI status (> 1 vs ≤ 1)                              | 1.6 (1.0, 2.5)      | 0.0592               |
| Baseline BMI (> 30 kg/m <sup>2</sup> vs ≤ 30 kg/m <sup>2</sup> ) | 0.5 (0.4, 0.8)      | 0.0006               |
| Prior use of nonbiologic DMARD (yes vs no)                       | 0.9 (0.6, 1.5)      | 0.7740               |
| Baseline 66-swollen joint count                                  | 1.0 (0.9, 1.0)      | 0.0148               |
| Baseline PASDAS score                                            | 0.8 (0.7, 1.0)      | 0.0303               |
| Baseline psoriasis-affected BSA                                  |                     |                      |
| Baseline BSA (≥ 10% vs < 10%)                                    | 1.2 (0.9, 1.6)      | 0.2926               |
| Baseline BMI (> 30 kg/m <sup>2</sup> vs ≤ 30 kg/m <sup>2</sup> ) | 0.5 (0.4, 0.8)      | < 0.0001             |
| Prior use of nonbiologic DMARD (yes vs no)                       | 0.7 (0.5, 1.1)      | 0.1646               |
| Baseline 66-swollen joint count                                  | 1.0 (1.0, 1.0)      | 0.0226               |
| Baseline PASDAS score                                            | 0.8 (0.7, 1.0)      | 0.0123               |

N = 851; number of subjects in the full analysis set. Based on logistic model adjusted for prior nonbiologic DMARD use, baseline BMI status (≤ 30 kg/m<sup>2</sup> or > 30kg/m<sup>2</sup>), and baseline 66-swollen joint count and for each clinical domain status evaluated (baseline enthesitis, LDI, mNAPSI, or psoriasis-affected BSA); additionally adjusted for PASDAS for PASDAS LDA and PASDAS Good Responses. <sup>a</sup>PASDAS LDA status at a specified week defined as “Yes” if absolute PASDAS score ≤ 3.2, otherwise as “No,” or as “missing” if PASDAS score is missing. <sup>b</sup>PASDAS Good Responses at a specified week defined as “Yes” if absolute PASDAS score ≤ 3.2 and PASDAS score change from baseline ≤ -1.6, otherwise as “No,” or “missing” if PASDAS or PASDAS change from baseline is missing. BMI = body mass index; BSA = body surface area; CI = confidence interval; DMARD = disease-modifying antirheumatic drug; LDI = Leeds Dactylitis Index; LEI = Leeds Enthesitis Index; MDA = Minimal Disease Activity; PASDAS = Psoriatic Arthritis Disease Activity Score; PASDAS LDA = Psoriatic Arthritis Disease Activity Score Low Disease Activity; SPARCC EI = Spondyloarthritis Research Consortium of Canada Enthesitis Index.

**Supplemental Table 2.** Covariance analysis of PASDAS change and DAPSA score change from baseline to Week 24 by baseline enthesitis (SPARCC EI and LEI), baseline LDI, baseline mNAPSI, and baseline psoriasis-affected BSA at Week 24

| Clinical Domain                                                  | Estimate (SE) | P-value <sup>a</sup> |
|------------------------------------------------------------------|---------------|----------------------|
| <b>PASDAS change from baseline to Week 24</b>                    |               |                      |
| Baseline enthesitis using SPARCC EI                              |               |                      |
| Baseline enthesitis (SPARCC EI > 0 vs = 0)                       | 0.0 (0.1)     | 0.7795               |
| Baseline BMI (> 30 kg/m <sup>2</sup> vs ≤ 30 kg/m <sup>2</sup> ) | 0.4 (0.1)     | 0.0007               |
| Prior use of nonbiologic DMARD (yes vs no)                       | 0.3 (0.2)     | 0.1441               |
| Baseline 66-swollen joint count                                  | 0 (0)         | 0.0212               |
| Baseline enthesitis using LEI                                    |               |                      |
| Baseline enthesitis (LEI > 0 vs = 0)                             | 0.1 (0.1)     | 0.5314               |
| Baseline BMI (> 30 kg/m <sup>2</sup> vs ≤ 30 kg/m <sup>2</sup> ) | 0.4 (0.1)     | 0.0008               |
| Prior use of nonbiologic DMARD (yes vs no)                       | 0.3 (0.2)     | 0.1430               |
| Baseline 66-swollen joint count                                  | 0 (0)         | 0.0177               |
| Baseline LDI                                                     |               |                      |
| Baseline LDI (> 0 vs = 0)                                        | -0.9 (0.1)    | < 0.0001             |
| Baseline BMI (> 30 kg/m <sup>2</sup> vs ≤ 30 kg/m <sup>2</sup> ) | 0.4 (0.1)     | 0.0003               |
| Prior use of nonbiologic DMARD (yes vs no)                       | 0.3 (0.2)     | 0.0940               |
| Baseline 66-swollen joint count                                  | 0 (0)         | 0.7405               |
| Baseline mNAPSI                                                  |               |                      |
| Baseline mNAPSI (> 1 vs ≤ 1)                                     | -0.7 (0.2)    | 0.0005               |
| Baseline BMI (> 30 kg/m <sup>2</sup> vs ≤ 30 kg/m <sup>2</sup> ) | 0.3 (0.2)     | 0.0286               |
| Prior use of nonbiologic DMARD (yes vs no)                       | 0.1 (0.2)     | 0.4878               |
| Baseline 66-swollen joint count                                  | 0 (0)         | 0.2290               |
| Baseline psoriasis-affected BSA                                  |               |                      |
| Baseline BSA (≥ 10% vs < 10%)                                    | -0.3 (0.1)    | 0.0098               |
| Baseline BMI (> 30 kg/m <sup>2</sup> vs ≤ 30 kg/m <sup>2</sup> ) | 0.4 (0.1)     | 0.0005               |
| Prior use of nonbiologic DMARD (yes vs no)                       | 0.3 (0.2)     | 0.1053               |
| Baseline 66-swollen joint count                                  | 0 (0)         | 0.0168               |
| <b>DAPSA score change from baseline to Week 24</b>               |               |                      |
| Baseline enthesitis using SPARCC EI                              |               |                      |
| Baseline enthesitis (SPARCC EI > 0 vs = 0)                       | -1.5 (1.5)    | 0.3351               |
| Baseline BMI (> 30 kg/m <sup>2</sup> vs ≤ 30 kg/m <sup>2</sup> ) | 3.1 (1.4)     | 0.0318               |
| Prior use of nonbiologic DMARD (yes vs no)                       | 1.9 (2.1)     | 0.3520               |
| Baseline 66-swollen joint count                                  | -0.9 (0.1)    | < 0.0001             |
| Baseline enthesitis using LEI                                    |               |                      |
| Baseline enthesitis (LEI > 0 vs = 0)                             | -0.5 (1.5)    | 0.7468               |
| Baseline BMI (> 30 kg/m <sup>2</sup> vs ≤ 30 kg/m <sup>2</sup> ) | 3.1 (1.4)     | 0.0344               |
| Prior use of nonbiologic DMARD (yes vs no)                       | 2.0 (2.1)     | 0.3339               |
| Baseline 66-swollen joint count                                  | -0.9 (0.1)    | < 0.0001             |
| Baseline LDI                                                     |               |                      |
| Baseline LDI (> 0 vs = 0)                                        | -3.8 (1.6)    | 0.0155               |
| Baseline BMI (> 30 kg/m <sup>2</sup> vs ≤ 30 kg/m <sup>2</sup> ) | 3.1 (1.4)     | 0.0330               |
| Prior use of non-biologic DMARD (yes vs no)                      | 2.2 (2.1)     | 0.2904               |
| Baseline 66-swollen joint count                                  | -0.9 (0.1)    | < 0.0001             |
| Baseline mNAPSI                                                  |               |                      |
| Baseline mNAPSI (> 1 vs ≤ 1)                                     | -3.6 (2.3)    | 0.1173               |
| Baseline BMI (> 30 kg/m <sup>2</sup> vs ≤ 30 kg/m <sup>2</sup> ) | 1.7 (1.8)     | 0.3504               |
| Prior use of nonbiologic DMARD (yes vs no)                       | 1.3 (2.6)     | 0.6216               |

| <b>Clinical Domain</b>                                             | <b>Estimate (SE)</b> | <b>P-value<sup>a</sup></b> |
|--------------------------------------------------------------------|----------------------|----------------------------|
| Baseline 66-swollen joint count                                    | -0.8 (0.1)           | < 0.0001                   |
| Baseline psoriasis-affected BSA                                    |                      |                            |
| Baseline BSA ( $\geq 10\%$ vs $< 10\%$ )                           | -1.6 (1.5)           | 0.2745                     |
| Baseline BMI ( $> 30 \text{ kg/m}^2$ vs $\leq 30 \text{ kg/m}^2$ ) | 3.1 (1.4)            | 0.0330                     |
| Prior use of nonbiologic DMARD (yes vs no)                         | 2.2 (2.1)            | 0.2904                     |
| Baseline 66-swollen joint count                                    | -0.9 (0.1)           | < 0.0001                   |

N = 851; number of subjects in the full analysis set. <sup>a</sup>Based on ANCOVA model adjusted for prior nonbiologic DMARD use, baseline BMI status ( $\leq 30 \text{ kg/m}^2$  or  $> 30 \text{ kg/m}^2$ ), and baseline 66-swollen joint count, and for each clinical domain status evaluated (baseline enthesitis, LDI, mNAPSI, or psoriasis-affected BSA). BMI = body mass index; BSA = body surface area; DAPSA = Disease Activity Index for Psoriatic Arthritis; DMARD = disease-modifying antirheumatic drug; LDI = Leeds Dactylitis Index; LEI = Leeds Enthesitis Index; PASDAS = Psoriatic Arthritis Disease Activity Score; SPARCC EI = Spondyloarthritis Research Consortium of Canada Enthesitis Index.
